# Supplementary material
Source: PubMed Central journal article supplement (PMC2935508)
Supplement: NIHMS229040-supplement-01.pdf [file NIHMS229040-supplement-01.pdf]

## Up in Tumor-Free Mice Treated with Vaccine + Anti-CD25

### Experiments 1+2

| Gene Set                                     | p-value  | FDR      |
|----------------------------------------------|----------|----------|
| STEMCELL_COMMON_UP                           | 0        | 0.018784 |
| HSIAO_LIVER_SPECIFIC_GENES                   | 0        | 0.022592 |
| CPR_LOW_LIVER_DN                             | 0        | 0.02914  |
| CHOLESTEROL_BIOSYNTHESIS                     | 0        | 0.056675 |
| HSC_STHSC_FETAL                              | 0        | 0.062272 |
| UVC_XPCS_ALL_DN                              | 0        | 0.069565 |
| BRACX_UP                                     | 0.003289 | 0.070181 |
| TPA_RESIST_EARLY_UP                          | 0        | 0.072886 |
| UVC_XPCS_8HR_DN                              | 0        | 0.074547 |
| CPR_NULL_LIVER_DN                            | 0        | 0.078674 |
| UVB_NHEK1_DN                                 | 0        | 0.079822 |
| IDX_TSA_DN_CLUSTER6                          | 0.01049  | 0.080885 |
| HSC_STHSC_SHARED                             | 0        | 0.081425 |
| MOREAUX_TACI_HI_VS_LOW_DN                    | 0        | 0.083259 |
| HSA04610_COMPLEMENT_AND_COAGULATION_CASCADES | 0        | 0.10156  |
| UVC_TTD-XPCS_COMMON_DN                       | 0        | 0.104492 |
| NICK_RHAPC_UP                                | 0.003546 | 0.106318 |
| IL7PATHWAY                                   | 0.013115 | 0.107492 |
| UVC_XPCS_4HR_DN                              | 0        | 0.109237 |
| NADLER_OBESITY_DN                            | 0.007194 | 0.113438 |
| CMV_HCMV_TIMECOURSE_18HRS_UP                 | 0        | 0.114806 |
| FLECHNER_KIDNEY_TRANSPLANT_WELL_UP           | 0        | 0.122817 |
| BLOOD_CLOTTING_CASCADE                       | 0.003521 | 0.151502 |
| TPA_RESIST_MIDDLE_UP                         | 0        | 0.158806 |
| FSH_OVARY_MCV152_UP                          | 0        | 0.173944 |
| BRCA1KO_MEF_DN                               | 0        | 0.178521 |
| HDACI_COLON_BUT30MIN_DN                      | 0.007435 | 0.179085 |
| UVC_TTD_ALL_DN                               | 0        | 0.180396 |
| UVC_TTD_4HR_DN                               | 0        | 0.184987 |
| UVB_NHEK1_C6                                 | 0        | 0.186193 |
| MARSHALL_SPLEEN_BAL                          | 0.018727 | 0.200027 |
| PAR1PATHWAY                                  | 0.028662 | 0.21274  |
| HDACI_COLON_SUL12HRS_DN                      | 0.021053 | 0.214085 |
| ET743_SARCOMA_24HRS_DN                       | 0        | 0.216648 |
| HSA00640_PROPANOATE_METABOLISM               | 0.003802 | 0.221284 |
| CHEN_HOXA5_TARGETS_UP                        | 0        | 0.225897 |
| UVB_NHEK3_C2                                 | 0.034884 | 0.225933 |
| ET743_SARCOMA_DN                             | 0        | 0.226064 |
| HSA00100_BIOSYNTHESIS_OF_STEROIDS            | 0.034965 | 0.22687  |
| ET743_SARCOMA_48HRS_DN                       | 0        | 0.227139 |
| GH_GHRHR_KO_24HRS_DN                         | 0        | 0.229476 |
| UVB_SCC_DN                                   | 0        | 0.230287 |
| TFF2_KO_UP                                   | 0.029703 | 0.232395 |
| FLECHNER_KIDNEY_TRANSPLANT_REJECTION_PBL_UP  | 0.017621 | 0.233387 |
| SHIPP_FL_VS_DLBCL_UP                         | 0.018051 | 0.233525 |
| CIRCADIAN_EXERCISE                           | 0.027344 | 0.233639 |

|                                 |          |          |
|---------------------------------|----------|----------|
| REOVIRUS_HEK293_UP              | 0        | 0.234757 |
| CELL_ADHESION_MOLECULE_ACTIVITY | 0.006098 | 0.238897 |
| STATIN_PATHWAY_PHARMGKB         | 0.046875 | 0.246418 |

### Experiment 1

| <u>Gene Set</u>                                    | <u>p-value</u> | <u>FDR</u>      |
|----------------------------------------------------|----------------|-----------------|
| HSAIO_LIVER_SPECIFIC_GENES                         | 0              | 0               |
| NADLER_OBESITY_DN                                  | 0              | 0.006496        |
| CPR_LOW_LIVER_DN                                   | 0              | 0.006867        |
| ADIP_HUMAN_UP                                      | 0              | 0.024882        |
| HSA04610_COMPLEMENT_AND_COAGULATION_CASCADES       | 0              | 0.03139         |
| CPR_NULL_LIVER_DN                                  | 0              | 0.03643         |
| HSA00980_METABOLISM_OF_XENOBIOTICS_BY_CYTOCHROME   | 0              | 0.041851        |
| HUMAN_TISSUE_LIVER                                 | 0              | 0.041877        |
| FETAL_LIVER_VS_ADULT_LIVER_GNF2                    | 0              | 0.044462        |
| HOUSTIS_ROS                                        | 0              | 0.046504        |
| STATIN_PATHWAY_PHARMGKB                            | 0              | 0.048986        |
| FLECHNER_KIDNEY_TRANSPLANT_WELL_UP                 | 0              | 0.049993        |
| <b>STEMCELL_COMMON_UP</b>                          | <b>0</b>       | <b>0.060373</b> |
| SHEPARD_BMYB_MORPHOLINO_DN                         | 0              | 0.064838        |
| TPA_RESIST_EARLY_UP                                | 0.002141       | 0.069036        |
| IDX_TSA_UP_CLUSTER1                                | 0.002358       | 0.073526        |
| FLECHNER_KIDNEY_TRANSPLANT_REJECTION_DN            | 0              | 0.077965        |
| GLUTATHIONE_METABOLISM                             | 0.002141       | 0.093819        |
| HSA00480_GLUTATHIONE_METABOLISM                    | 0.006466       | 0.121716        |
| CIRCADIAN_EXERCISE                                 | 0              | 0.13762         |
| BLOOD_CLOTTING_CASCADE                             | 0.006637       | 0.143008        |
| DOX_RESIST_GASTRIC_DN                              | 0.002232       | 0.143472        |
| HSA00280_VALINE_LEUCINE_AND_ISOLEUCINE_DEGRADATION | 0.007109       | 0.225346        |
| NADLER_OBESITY_UP                                  | 0.006993       | 0.229754        |
| INTRINSICPATHWAY                                   | 0.022371       | 0.233318        |
| CREB_BRAIN_2WKS_UP                                 | 0.016055       | 0.237649        |
| TPA_RESIST_MIDDLE_UP                               | 0.012397       | 0.240233        |
| LI_FETAL_VS_WT_KIDNEY_UP                           | 0              | 0.240476        |

### Experiment 2

| <u>Gene Set</u>                            | <u>p-value</u> | <u>FDR</u> |
|--------------------------------------------|----------------|------------|
| CHOLESTEROL_BIOSYNTHESIS                   | 0              | 0.00541    |
| IL7PATHWAY                                 | 0              | 0.006214   |
| BRACX_UP                                   | 0              | 0.012878   |
| HSA03010_RIBOSOME                          | 0              | 0.01565    |
| GLEEVECPATHWAY                             | 0.003906       | 0.030388   |
| MRNA_PROCESSING_REACTOME                   | 0              | 0.054535   |
| MARSHALL_SPLEEN_BAL                        | 0              | 0.055281   |
| HSA04660_T_CELL_RECEPTOR_SIGNALING_PATHWAY | 0              | 0.061682   |
| MRNA_PROCESSING                            | 0              | 0.062801   |
| MOREAUX_TACI_HI_VS_LOW_DN                  | 0              | 0.087228   |
| HSA00100_BIOSYNTHESIS_OF_STEROIDS          | 0              | 0.095465   |

|                                             |          |                 |
|---------------------------------------------|----------|-----------------|
| HDACI_COLON_TSABUT_DN                       | 0.004016 | 0.098174        |
| UVC_TTD-XPCS_COMMON_DN                      | 0        | 0.105585        |
| UVB_NHEK3_C2                                | 0.005181 | 0.112996        |
| UVC_XPCS_8HR_DN                             | 0        | 0.126544        |
| NICK_RHAPC_UP                               | 0.014019 | 0.134717        |
| FSH_OVARY_MCV152_UP                         | 0        | 0.139887        |
| SA_CASPASE_CASCADE                          | 0.017668 | 0.145897        |
| FLECHNER_KIDNEY_TRANSPLANT_REJECTION_PBL_UP | 0.007042 | 0.148662        |
| EGFPATHWAY                                  | 0.008811 | 0.155748        |
| UVB_SCC_DN                                  | 0        | 0.160339        |
| ET743_SARCOMA_24HRS_DN                      | 0        | 0.160718        |
| UVB_NHEK1_C6                                | 0        | 0.160884        |
| UVC_TTD_ALL_DN                              | 0        | 0.161631        |
| BYSTROM_IL5_DN                              | 0        | 0.163932        |
| GAMMA_ESR_WS_UNREG                          | 0.018692 | 0.164164        |
| RIBOSOMAL_PROTEINS                          | 0        | 0.164592        |
| MMS_MOUSE_LYMPH_HIGH_24HRS_UP               | 0.024896 | 0.165001        |
| TCRPATHWAY                                  | 0        | 0.165234        |
| ET743_SARCOMA_48HRS_DN                      | 0        | 0.167592        |
| ET743_SARCOMA_DN                            | 0        | 0.167879        |
| CALCINEURIN_NF_AT_SIGNALING                 | 0.01087  | 0.168111        |
| UVC_XPCS_ALL_DN                             | 0        | 0.169326        |
| FSH_OVARY_MCV152_DN                         | 0.012579 | 0.171915        |
| FLECHNER_KIDNEY_TRANSPLANT_WELL_PBL_DN      | 0.023392 | 0.171985        |
| LOTEM_LEUKEMIA_UP                           | 0.021277 | 0.172993        |
| GH_GHRHR_KO_24HRS_DN                        | 0        | 0.173113        |
| LEE_TCELLS1_UP                              | 0        | 0.173129        |
| LEE_TCELLS10_UP                             | 0        | 0.173484        |
| UVB_NHEK1_DN                                | 0        | 0.173499        |
| LEE_TCELLS8_UP                              | 0        | 0.174722        |
| GH_EXOGENOUS_EARLY_UP                       | 0.036496 | 0.175574        |
| UVC_XPCS_4HR_DN                             | 0        | 0.176798        |
| IDX_TSA_DN_CLUSTER6                         | 0.017621 | 0.177108        |
| SHIPP_FL_VS_DLBCL_UP                        | 0.017857 | 0.177327        |
| APOPTOSIS_GENMAPP                           | 0.006369 | 0.178885        |
| HSA00640_PROPANOATE_METABOLISM              | 0.023697 | 0.18033         |
| ET743_SARCOMA_72HRS_DN                      | 0        | 0.180927        |
| CHEN_HOXA5_TARGETS_UP                       | 0        | 0.182011        |
| <b>STEMCELL_COMMON_UP</b>                   | <b>0</b> | <b>0.184426</b> |
| CMV_HCMV_TIMECOURSE_4HRS_DN                 | 0.020513 | 0.192079        |
| UVB_NHEK2_DN                                | 0        | 0.194683        |
| GALE_FLT3ANDAPL_UP                          | 0        | 0.194918        |
| UVB_NHEK3_C5                                | 0.037634 | 0.195705        |
| PDGFPATHWAY                                 | 0.021277 | 0.196263        |
| HSC_STHSC_FETAL                             | 0.044898 | 0.197362        |
| LEE_TCELLS4_UP                              | 0.027778 | 0.197454        |
| FETAL_LIVER_ENRICHED_TRANSCRIPTION_FACTORS  | 0.016529 | 0.198764        |
| TPOPATHWAY                                  | 0.048246 | 0.199334        |
| GUO_HEX_UP                                  | 0.018349 | 0.199455        |
| REOVIRUS_HEK293_UP                          | 0        | 0.199575        |
| GAMMA_ESR_OLD_UNREG                         | 0.037037 | 0.199747        |

|                                          |          |          |
|------------------------------------------|----------|----------|
| HSC_STHSC_SHARED                         | 0.039301 | 0.201308 |
| HDACI_COLON_SUL12HRS_DN                  | 0.038251 | 0.201455 |
| P53_SIGNALING                            | 0        | 0.201672 |
| PARK_HSC_VS_MPP_UP                       | 0.04878  | 0.202133 |
| SA_B_CELL_RECEPTOR_COMPLEXES             | 0.028302 | 0.203763 |
| ST_DIFFERENTIATION_PATHWAY_IN_PC12_CELLS | 0.021978 | 0.206804 |
| CMV_24HRS_UP                             | 0        | 0.214161 |
| CAMPTOTHECIN_PROBCELL_DN                 | 0.037559 | 0.216381 |
| UVC_TTD_4HR_DN                           | 0        | 0.217285 |
| PARK_MSCS_DIFF                           | 0.039409 | 0.219653 |
| CMV_HCMV_TIMECOURSE_18HRS_UP             | 0.024    | 0.234028 |

## Up in Tumor-Free Mice Treated with Vaccine

### Experiments 1+2

| <u>Gene Set</u>                                | <u>p-value</u> | <u>FDR</u>      |
|------------------------------------------------|----------------|-----------------|
| UVC_TTD-XPCS_COMMON_DN                         | 0              | 0               |
| FLECHNER_KIDNEY_TRANSPLANT_WELL_UP             | 0              | 9.18E-04        |
| CMV_HCMV_TIMECOURSE_18HRS_UP                   | 0              | 0.001255        |
| UVC_TTD_4HR_DN                                 | 0              | 0.002352        |
| UVC_TTD_ALL_DN                                 | 0              | 0.002605        |
| DOX_RESIST_GASTRIC_DN                          | 0              | 0.002697        |
| <b>STEMCELL_COMMON_UP</b>                      | <b>0</b>       | <b>0.003031</b> |
| UVC_XPCS_ALL_DN                                | 0              | 0.003147        |
| MOREAUX_TACI_HI_VS_LOW_DN                      | 0              | 0.003371        |
| UVB_NHEK1_DN                                   | 0              | 0.003437        |
| UVC_XPCS_8HR_DN                                | 0              | 0.00346         |
| ZHAN_MMPC_PC                                   | 0              | 0.003593        |
| UVC_XPCS_4HR_DN                                | 0              | 0.005218        |
| CISPLATIN_PROBCELL_UP                          | 0              | 0.006725        |
| UVB_SCC_UP                                     | 0              | 0.007166        |
| LINDSTEDT_DEND_DN                              | 0              | 0.008045        |
| GOLDRATH_CELLCYCLE                             | 0              | 0.008115        |
| SIG_BCR_SIGNALING_PATHWAY                      | 0              | 0.008294        |
| UVB_NHEK1_C6                                   | 0              | 0.012718        |
| HSC_MATURE_ADULT                               | 0              | 0.012887        |
| ROTH_HTERT_DIFF                                | 0              | 0.013123        |
| HSC_MATURE_SHARED                              | 0              | 0.013295        |
| HSA00632_BENZOATE_DEGRADATION_VIA_COA_LIGATION | 0              | 0.016806        |
| REOVIRUS_HEK293_UP                             | 0              | 0.017196        |
| HSC_LATEPROGENITORS_ADULT                      | 0              | 0.017396        |
| UVB_NHEK3_C2                                   | 0              | 0.017537        |
| UVB_SCC_DN                                     | 0              | 0.018065        |
| ET743_SARCOMA_48HRS_DN                         | 0              | 0.019145        |
| FLECHNER_KIDNEY_TRANSPLANT_REJECTION_PBL_UP    | 0              | 0.021267        |
| WNTPATHWAY                                     | 0              | 0.021342        |
| TARTE_BCELL                                    | 0              | 0.021416        |
| PPARAPATHWAY                                   | 0              | 0.021428        |
| ET743_SARCOMA_24HRS_DN                         | 0              | 0.021799        |
| CERAMIDEPATHWAY                                | 0.006787       | 0.021854        |
| CMV_HCMV_TIMECOURSE_16HRS_UP                   | 0              | 0.021886        |
| HSA04662_B_CELL_RECEPTOR_SIGNALING_PATHWAY     | 0              | 0.023338        |
| HSC_LATEPROGENITORS_SHARED                     | 0              | 0.023363        |
| GAMMA-UV_FIBRO_UP                              | 0              | 0.023865        |
| HSC_LATEPROGENITORS_FETAL                      | 0              | 0.026436        |
| PENG_LEUCINE_DN                                | 0              | 0.026522        |
| YU_CMYC_UP                                     | 0.002674       | 0.027397        |
| UVC_HIGH_D3_DN                                 | 0              | 0.029681        |
| ET743_SARCOMA_DN                               | 0              | 0.03031         |
| KNUDSEN_PMNS_DN                                | 0              | 0.030482        |
| YU_CMYC_DN                                     | 0              | 0.03116         |
| SIG_PIP3_SIGNALING_IN_B_LYMPHOCYTES            | 0              | 0.031445        |

|                                                     |          |          |
|-----------------------------------------------------|----------|----------|
| MYOD_NIH3T3_DN                                      | 0        | 0.031742 |
| HSC_MATURE_FETAL                                    | 0        | 0.031774 |
| LINDSTEDT_DEND_8H_VS_48H_DN                         | 0.002762 | 0.032171 |
| MITOCHONDRIAL_FATTY_ACID_BETAOXIDATION              | 0.004762 | 0.03263  |
| MITOCHONDRIAPATHWAY                                 | 0.002747 | 0.033595 |
| HIVNEFPATHWAY                                       | 0        | 0.034247 |
| BRCA_PROGNOSIS_NEG                                  | 0        | 0.034497 |
| WANG_MLL_CBP_VS_GMP_DN                              | 0        | 0.035148 |
| CPR_LOW_LIVER_DN                                    | 0.004739 | 0.035456 |
| GREENBAUM_E2A_UP                                    | 0.00277  | 0.03737  |
| FSH_OVARY_MCV152_UP                                 | 0        | 0.038959 |
| UVC_HIGH_ALL_DN                                     | 0        | 0.039542 |
| BYSTROM_IL5_DN                                      | 0        | 0.041405 |
| BRCA1KO_MEF_DN                                      | 0        | 0.041777 |
| PENG_GLUCOSE_DN                                     | 0        | 0.04187  |
| CROMER_HYPOPHARYNGEAL_MET_VS_NON_UP                 | 0        | 0.041927 |
| TARTE_PLASMA_BLASTIC                                | 0        | 0.044115 |
| IDX_TSA_DN_CLUSTER4                                 | 0.009434 | 0.044443 |
| ST_DICTYOSTELIUM_DISCOIDEUM_CAMP_CHEMOTAXIS_PATHWAY | 0        | 0.044462 |
| HSA04210_APOPTOSIS                                  | 0        | 0.044575 |
| HSA00903_LIMONENE_AND_PINENE_DEGRADATION            | 0.01     | 0.044768 |
| CPR_NULL_LIVER_UP                                   | 0        | 0.044907 |
| JECHLINGER_EMT_DN                                   | 0.005195 | 0.045905 |
| 4NQO_UNIQUE_FIBRO_UP                                | 0.004494 | 0.046245 |
| CHANG_SERUM_RESPONSE_DN                             | 0        | 0.046303 |
| CHEMICALPATHWAY                                     | 0.009569 | 0.046345 |
| BRCA1_OVEREXP_UP                                    | 0        | 0.046461 |
| ET743_SARCOMA_72HRS_DN                              | 0        | 0.046558 |
| ST_ERK1_ERK2_MAPK_PATHWAY                           | 0.005155 | 0.046579 |
| PRMT5_KD_UP                                         | 0        | 0.046806 |
| RADIATION_SENSITIVITY                               | 0.009615 | 0.047231 |
| P53_SIGNALING                                       | 0        | 0.051465 |
| ZHAN_MULTIPLE_MYELOMA_VS_NORMAL_DN                  | 0.005195 | 0.052949 |
| NTHIPATHWAY                                         | 0.014493 | 0.053078 |
| CHESLER_BRAIN_HIGHEST_VARIANCE_GENES                | 0.002688 | 0.053177 |
| EMT_DN                                              | 0        | 0.053428 |
| GUO_HEX_UP                                          | 0        | 0.05376  |
| JISON_SICKLECELL_DIFF                               | 0        | 0.053899 |
| PARK_RARALPHA_UP                                    | 0        | 0.054178 |
| CHEN_HOXA5_TARGETS_UP                               | 0        | 0.054351 |
| RCC_NL_UP                                           | 0        | 0.054489 |
| P53PATHWAY                                          | 0.007126 | 0.054518 |
| MMS_HUMAN_LYMPH_LOW_4HRS_DN                         | 0.014599 | 0.05469  |
| HCC_SURVIVAL_GOOD_VS_POOR_DN                        | 0        | 0.054761 |
| KLEIN_PEL_DN                                        | 0.005333 | 0.054767 |
| APPEL_IMATINIB_UP                                   | 0        | 0.054951 |
| FRASOR_ER_DN                                        | 0        | 0.054955 |
| BADPATHWAY                                          | 0.005181 | 0.055138 |
| PARK_MSCS_BOTH                                      | 0.002591 | 0.055318 |
| TAKEDA_NUP8_HOXA9_3D_DN                             | 0.007299 | 0.055362 |
| MRNA_PROCESSING                                     | 0.002571 | 0.056716 |

|                                           |          |          |
|-------------------------------------------|----------|----------|
| FLECHNER_KIDNEY_TRANSPLANT_REJECTION_DN   | 0        | 0.05713  |
| HSA00252_ALANINE_AND_ASPARTATE_METABOLISM | 0.004938 | 0.057218 |
| GSK3PATHWAY                               | 0.005291 | 0.057496 |
| IDX_TSA_DN_CLUSTER5                       | 0        | 0.057537 |
| ST_B_CELL_ANTIGEN_RECEPTOR                | 0        | 0.057643 |
| DIAB_NEPH_DN                              | 0        | 0.057695 |
| PENG_RAPAMYCIN_DN                         | 0        | 0.058109 |
| LI_FETAL_VS_WT_KIDNEY_UP                  | 0        | 0.058203 |
| GENOTOXINS_ALL_24HRS_REG                  | 0.014563 | 0.058217 |
| ROME_INSULIN_2F_UP                        | 0        | 0.059151 |
| HSA00020_CITRATE_CYCLE                    | 0.012376 | 0.059516 |
| CANCER_UNDIFFERENTIATED_META_UP           | 0        | 0.059534 |
| SHEPARD_BMYB_MORPHOLINO_UP                | 0        | 0.05975  |
| SCHUMACHER_MYC_UP                         | 0.008287 | 0.059922 |
| PENG_GLUTAMINE_DN                         | 0        | 0.060066 |
| WALKER_MM_SNP_DIFF                        | 0.012136 | 0.060303 |
| HSC_STHSC_FETAL                           | 0.010025 | 0.060489 |
| HSA04115_P53_SIGNALING_PATHWAY            | 0.00271  | 0.060935 |
| ADDYA_K562_HEMIN_TREATMENT                | 0.00277  | 0.06098  |
| CITRATE_CYCLE_TCA_CYCLE                   | 0.019512 | 0.061643 |
| ADIP_VS_PREADIP_UP                        | 0.005464 | 0.062243 |
| CK1PATHWAY                                | 0.021583 | 0.062383 |
| FLECHNER_KIDNEY_TRANSPLANT_WELL_PBL_DN    | 0.002387 | 0.063134 |
| FALT_BCLL_IG_MUTATED_VS_WT_DN             | 0.002494 | 0.063361 |
| UVC_TTD_8HR_DN                            | 0        | 0.063575 |
| KNUDSEN_PMNS_UP                           | 0.002801 | 0.063936 |
| NICK_RHAPC_UP                             | 0.014706 | 0.064222 |
| H2O2_CSBRESCUED_UP                        | 0.002882 | 0.064894 |
| HSA05220_CHRONIC_MYELOID_LEUKEMIA         | 0        | 0.066329 |
| PITX2PATHWAY                              | 0.027714 | 0.06709  |
| FATTY_ACID_METABOLISM                     | 0.008242 | 0.068208 |
| UVB_NHEK3_C1                              | 0.005587 | 0.068368 |
| HSA05213_ENDOMETRIAL_CANCER               | 0.011268 | 0.068384 |
| LEE_TCELLS1_UP                            | 0.003597 | 0.068911 |
| AMINOACYL_TRNA_BIOSYNTHESIS               | 0.016393 | 0.069122 |
| SERUM_FIBROBLAST_CORE_DN                  | 0        | 0.069273 |
| HSC_STHSC_SHARED                          | 0.018824 | 0.069425 |
| HSA00512_O_GLYCAN_BIOSYNTHESIS            | 0.02551  | 0.069875 |
| H2O2_CSBDIFF_C1                           | 0.011338 | 0.070505 |
| SANA_TNFA_ENDOTHELIAL_UP                  | 0        | 0.07101  |
| AGED_MOUSE_RETINA_ANY_UP                  | 0.0175   | 0.072117 |
| FALT_BCLL_DN                              | 0.005102 | 0.072648 |
| IGF1MTORPATHWAY                           | 0.016509 | 0.075168 |
| LU_IL4BCELL                               | 0.002762 | 0.075316 |
| MMS_MOUSE_LYMPH_HIGH_24HRS_UP             | 0.023018 | 0.075487 |
| HUMAN_CD34_ENRICHED_TRANSCRIPTION_FACTORS | 0        | 0.075766 |
| YAGI_AML_PROG_FAB                         | 0        | 0.076018 |
| VHL_NORMAL_UP                             | 0        | 0.076375 |
| HCMVPATHWAY                               | 0.023364 | 0.077437 |
| LI_FETAL_VS_WT_KIDNEY_DN                  | 0        | 0.077655 |
| HOFMANN_MANTEL_LYMPHOMA_VS_LYMPH_NODES_UP | 0.002571 | 0.077656 |

|                                                           |          |          |
|-----------------------------------------------------------|----------|----------|
| LEE_TCELLS10_UP                                           | 0        | 0.080475 |
| UVB_NHEK2_DN                                              | 0.006024 | 0.081097 |
| LEE_TCELLS8_UP                                            | 0.003333 | 0.08314  |
| CAMPTOTHECIN_PROBCELL_UP                                  | 0.025189 | 0.085047 |
| MTORPATHWAY                                               | 0.017115 | 0.085338 |
| LE_MYELIN_UP                                              | 0.00303  | 0.085572 |
| AGUIRRE_PANCREAS_CHR12                                    | 0.023018 | 0.085633 |
| AGUIRRE_PANCREAS_CHR1                                     | 0.012346 | 0.087233 |
| ADIPOGENESIS_HMSC_CLASS3_UP                               | 0.005556 | 0.087541 |
| NOUZOVA_CPG_H4_UP                                         | 0.003155 | 0.087547 |
| GOLDRATH_HP                                               | 0        | 0.087666 |
| HSA00563_GLYCOSYLPHOSPHATIDYLINOSITOL_ANCHOR_BIOSYNTHESIS | 0.009926 | 0.087768 |
| APOPTOSIS_GENMAPP                                         | 0.010638 | 0.091895 |
| VIPPATHWAY                                                | 0.034211 | 0.094099 |
| HSA05212_PANCREATIC_CANCER                                | 0.006757 | 0.094119 |
| SMITH_HTERT_UP                                            | 0.003322 | 0.095149 |
| HSA00624_1_AND_2_METHYLNAPHTHALENE_DEGRADATION            | 0.026247 | 0.09579  |
| UVB_NHEK3_ALL                                             | 0        | 0.096181 |
| RIBAVIRIN_RSV_DN                                          | 0.012953 | 0.096502 |
| AGEING_BRAIN_UP                                           | 0        | 0.096734 |
| BASSO_GERMINAL_CENTER_CD40_UP                             | 0.003021 | 0.096891 |
| CHOLESTEROL_BIOSYNTHESIS                                  | 0.023981 | 0.096975 |
| IGLESIAS_E2FMINUS_UP                                      | 0        | 0.097337 |
| AGED_MOUSE_HIPPOCAMPUS_ANY_UP                             | 0.021053 | 0.097701 |
| DAVIES_MGUS_MM                                            | 0.033175 | 0.09808  |
| UVC_HIGH_D5_DN                                            | 0.028497 | 0.098594 |
| DEATHPATHWAY                                              | 0.022167 | 0.099116 |
| SMITH_HTERT_DN                                            | 0.008746 | 0.099243 |
| ZHAN_MMPC_LATEVS                                          | 0.013158 | 0.099729 |
| HSA04120_UBIQUITIN_MEDIATED_PROTEOLYSIS                   | 0.017722 | 0.100339 |
| CANCERDRUGS_PROBCELL_UP                                   | 0.031746 | 0.100861 |
| CELL_CYCLE_KEGG                                           | 0.017094 | 0.104589 |
| HSA04110_CELL_CYCLE                                       | 0.003012 | 0.106579 |
| HADDAD_HPCLYMPHO_ENRICHED                                 | 0        | 0.106682 |
| KREBS_TCA_CYCLE                                           | 0.026525 | 0.106728 |
| GLUTAMATE_METABOLISM                                      | 0.036082 | 0.107106 |
| HSA01510_NEURODEGENERATIVE_DISEASES                       | 0.019231 | 0.107107 |
| H2O2_CSBDIFF_C2                                           | 0.028205 | 0.107281 |
| UEDA_MOUSE_LIVER                                          | 0        | 0.107386 |
| HSA00650_BUTANOATE_METABOLISM                             | 0.010753 | 0.107388 |
| CIS_XPC_DN                                                | 0        | 0.107404 |
| VERHAAK_AML_NPM1_MUT_VS_WT_UP                             | 0.003367 | 0.107551 |
| TAKEDA_NUP8_HOXA9_8D_DN                                   | 0.003571 | 0.107619 |
| HSA05215_PROSTATE_CANCER                                  | 0.009434 | 0.107825 |
| HSA05214_GLIOMA                                           | 0.008264 | 0.111909 |
| HADDAD_HSC_CD10_UP                                        | 0        | 0.112272 |
| ALCALAY_AML_NPMC_DN                                       | 0.003584 | 0.113865 |
| HDACI_COLON_BUT_DN                                        | 0        | 0.114456 |
| TRNA_SYNTHETASES                                          | 0.042929 | 0.115652 |
| UV-4NQO_FIBRO_UP                                          | 0.03038  | 0.115984 |
| ADIP_DIFF_CLUSTER5                                        | 0.035897 | 0.117738 |



|                                                    |          |          |
|----------------------------------------------------|----------|----------|
| METHOTREXATE_PROBCELL_UP                           | 0.03163  | 0.120228 |
| YAGI_AML_PROGNOSIS                                 | 0.033679 | 0.121745 |
| IFNA_HCMV_6HRS_UP                                  | 0.026178 | 0.121799 |
| BRENTANI_IMMUNE_FUNCTION                           | 0.026087 | 0.121961 |
| HSA00760_NICOTINATE_AND_NICOTINAMIDE_METABOLISM    | 0.033654 | 0.122213 |
| SANSOM_APC_LOSS5_UP                                | 0.017647 | 0.122982 |
| CANTHARIDIN_DN                                     | 0.005141 | 0.123333 |
| HSA05221_ACUTE_MYELOID_LEUKEMIA                    | 0.029412 | 0.123347 |
| BAF57_BT549_DN                                     | 0        | 0.126414 |
| HSA04130_SNARE_INTERACTIONS_IN_VESICULAR_TRANSPORT | 0.029126 | 0.127121 |
| HSA04640_HEMATOPOIETIC_CELL_LINEAGE                | 0.025714 | 0.12759  |
| ROSS_CBF_MYH                                       | 0.01084  | 0.12918  |
| BLEO_HUMAN_LYMPH_HIGH_24HRS_UP                     | 0        | 0.129427 |
| LEE_DENA_UP                                        | 0.013774 | 0.129593 |
| GALE_FLT3ANDAPL_UP                                 | 0.031088 | 0.132082 |
| CHIARETTI_T_ALL_DIFF                               | 0        | 0.132116 |
| HDACI_COLON_BUT48HRS_DN                            | 0.0033   | 0.133136 |
| CIRCADIAN_EXERCISE                                 | 0.025063 | 0.133216 |
| HSA04664_FC_EPSILON_RI_SIGNALING_PATHWAY           | 0.014793 | 0.133519 |
| HDACI_COLON_BUT16HRS_DN                            | 0.005917 | 0.133778 |
| SERUM_FIBROBLAST_CELLCYCLE                         | 0.009554 | 0.134152 |
| CELL_CYCLE                                         | 0.02454  | 0.13439  |
| UVB_NHEK3_C5                                       | 0.029851 | 0.134479 |
| HSA00562_INOSITOL_PHOSPHATE_METABOLISM             | 0.023747 | 0.134842 |
| BRG1_ALAB_DN                                       | 0.023196 | 0.134906 |
| ST_PHOSPHOINOSITIDE_3_KINASE_PATHWAY               | 0.026455 | 0.13514  |
| MRNA_PROCESSING_REACTOME                           | 0.00627  | 0.135253 |
| HEARTFAILURE_ATRIA_DN                              | 0.02349  | 0.135255 |
| IL7PATHWAY                                         | 0.043379 | 0.135398 |
| SRC_ONCOGENIC_SIGNATURE                            | 0.027322 | 0.135986 |
| UEDA_MOUSE_SCN                                     | 0.009202 | 0.136264 |
| HDACI_COLON_BUT24HRS_DN                            | 0.012384 | 0.136377 |
| HESS_HOXAANMEIS1_UP                                | 0.018018 | 0.136759 |
| FERRANDO_MLL_T_ALL_DN                              | 0.020772 | 0.136879 |
| BASSO_REGULATORY_HUBS                              | 0.007326 | 0.136945 |
| ALANINE_AND_ASPARTATE_METABOLISM                   | 0.045822 | 0.137189 |
| AGED_RHESUS_DN                                     | 0.006173 | 0.138163 |
| PENG_GLYTAMINE_UP                                  | 0        | 0.138256 |
| RUTELLA_HEPATGFSNDCS_UP                            | 0.006873 | 0.138504 |
| HESS_HOXAANMEIS1_DN                                | 0.0125   | 0.139203 |
| CROONQUIST_IL6_STARVE_UP                           | 0.044156 | 0.141315 |
| STRESS_ARSENIC_SPECIFIC_UP                         | 0.007273 | 0.142629 |
| PEART_HISTONE_DN                                   | 0.011662 | 0.143136 |
| CHIARETTI_T_ALL                                    | 0.008    | 0.144875 |
| LIAN_MYELOID_DIFF_TF                               | 0.046997 | 0.147265 |
| ZHAN_MM_CD138_MF_VS_REST                           | 0.048128 | 0.147752 |
| NELSON_ANDROGEN_UP                                 | 0.042169 | 0.148871 |
| BRCA2_BRCA1_DN                                     | 0.044737 | 0.150049 |
| EGF_HDMEC_UP                                       | 0.032345 | 0.153218 |
| GH_GHRHR_KO_24HRS_DN                               | 0        | 0.154258 |
| HSA04650_NATURAL_KILLER_CELL_MEDIATED_CYTOTOXICITY | 0.011765 | 0.154337 |

|                                               |          |          |
|-----------------------------------------------|----------|----------|
| STRESS_GENOTOXIC_SPECIFIC_DN                  | 0.040431 | 0.157483 |
| BREASTCA_TWO_CLASSES                          | 0.02349  | 0.159485 |
| CTNNB1_ONCOGENIC_SIGNATURE                    | 0.022472 | 0.159868 |
| VERNELL_PRB_CLSTR1                            | 0.034121 | 0.164311 |
| AGED_MOUSE_HYPOTH_UP                          | 0.04     | 0.164858 |
| WIELAND_HEPATITIS_B_INDUCED                   | 0.024922 | 0.164884 |
| ROSS_MLL_FUSION                               | 0.035714 | 0.167923 |
| HSA05211_RENAL_CELL_CARCINOMA                 | 0.021084 | 0.16942  |
| HEMATOPOESIS_RELATED_TRANSCRIPTION_FACTORS    | 0.023324 | 0.17003  |
| TPA_SENS_LATE_DN                              | 0.016807 | 0.170659 |
| BYSTRYKH_HSC_CIS_GLOCUS                       | 0.007168 | 0.171265 |
| MOREAUX_TACI_HI_IN_PPC_UP                     | 0.034853 | 0.171388 |
| UVB_NHEK3_C0                                  | 0.022222 | 0.177839 |
| NGUYEN_KERATO_DN                              | 0.021672 | 0.179131 |
| BYSTRYKH_HSC_BRAIN_CIS_GLOCUS                 | 0.025    | 0.179234 |
| FLOTHO_CASP8AP2_MRD_DIFF                      | 0.033951 | 0.179803 |
| PASSERINI_APOPTOSIS                           | 0.049724 | 0.180836 |
| HOFFMANN_BIVSBII_IMVM                         | 0.022013 | 0.1809   |
| APOPTOSIS                                     | 0.032738 | 0.181063 |
| AGEING_KIDNEY_DN                              | 0.028213 | 0.183656 |
| HDACI_COLON_SUL_DN                            | 0.003759 | 0.187167 |
| LEE_CIP_UP                                    | 0.048913 | 0.191036 |
| FETAL_LIVER_ENRICHED_TRANSCRIPTION_FACTORS    | 0.023324 | 0.191343 |
| TAKEDA_NUP8_HOXA9_10D_DN                      | 0.011799 | 0.191757 |
| LINDSTEDT_DEND_8H_VS_48H_UP                   | 0.047059 | 0.194032 |
| HDACI_COLON_SUL48HRS_UP                       | 0.036036 | 0.195578 |
| ALZHEIMERS_INCIPIENT_DN                       | 0.013333 | 0.196193 |
| AGEING_KIDNEY_SPECIFIC_DN                     | 0.041009 | 0.196505 |
| ICHIBA_GVHD                                   | 0.014563 | 0.200199 |
| HOHENKIRK_MONOCYTE_DEND_DN                    | 0.028754 | 0.200981 |
| HOFFMANN_BIVSBII_BI_TABLE2                    | 0        | 0.201136 |
| LH_GRANULOSA_UP                               | 0.038123 | 0.201409 |
| HYPOXIA_NORMAL_UP                             | 0.014599 | 0.202289 |
| FSH_GRANULOSA_UP                              | 0.042373 | 0.202452 |
| HOFFMANN_BIVSBII_LGBII                        | 0.016502 | 0.20396  |
| CMV_HCMV_TIMECOURSE_ALL_UP                    | 0.011976 | 0.203993 |
| FERNANDEZ_MYC_TARGETS                         | 0.026217 | 0.204937 |
| TAKEDA_NUP8_HOXA9_16D_DN                      | 0.020979 | 0.20768  |
| HSC_EARLYPROGENITORS_ADULT                    | 0        | 0.215215 |
| HSA04620_TOLL_LIKE_RECEPTOR_SIGNALING_PATHWAY | 0.047022 | 0.217573 |
| CMV_24HRS_UP                                  | 0.049231 | 0.21942  |
| IDX_TSA_UP_CLUSTER5                           | 0.044872 | 0.220865 |
| KRETZSCHMAR_IL6_DIFF                          | 0.022801 | 0.226705 |
| HYPOXIA_RCC_UP                                | 0.044444 | 0.227625 |
| IDX_TSA_UP_CLUSTER6                           | 0.037037 | 0.229323 |
| ALCALAY_AML_NPMC_UP                           | 0.047458 | 0.23114  |
| BRCA1_OVEREXP_DN                              | 0.041812 | 0.239017 |
| HDACI_COLON_SUL_UP                            | 0.04902  | 0.241163 |
| HSC_EARLYPROGENITORS_FETAL                    | 0.00565  | 0.241421 |
| HSC_EARLYPROGENITORS_SHARED                   | 0.016043 | 0.242149 |

### Experiment 1

| <u>Gene Set</u>                                           | <u>p-value</u> | <u>FDR</u>      |
|-----------------------------------------------------------|----------------|-----------------|
| GOLDRATH_CELLCYCLE                                        | 0              | 0.004462        |
| <b>STEMCELL_COMMON_UP</b>                                 | <b>0</b>       | <b>0.104286</b> |
| HSA00624_1_AND_2_METHYLNAPHTHALENE_DEGRADATION            | 0              | 0.109147        |
| HSA00563_GLYCOSYLPHOSPHATIDYLINOSITOL_ANCHOR_BIOSYNTHESIS | 0              | 0.132197        |
| HSA00632_BENZOATE_DEGRADATION_VIA_COA_LIGATION            | 0              | 0.148205        |
| PENG_RAPAMYCIN_DN                                         | 0              | 0.153769        |
| LE_MYELIN_UP                                              | 0              | 0.1549          |
| BRCA_PROGNOSIS_NEG                                        | 0              | 0.157778        |
| MOREAUX_TACI_HI_IN_PPC_UP                                 | 0              | 0.158326        |
| CELL_CYCLE_KEGG                                           | 0              | 0.160331        |
| WANG_MLL_CBP_VS_GMP_DN                                    | 0.002597       | 0.160735        |
| UVC_TTD-XPCS_COMMON_DN                                    | 0              | 0.161868        |
| CELL_CYCLE                                                | 0              | 0.162724        |
| YU_CMYC_UP                                                | 0              | 0.164306        |
| KREBS_TCA_CYCLE                                           | 0              | 0.166722        |
| CANCER_UNDIFFERENTIATED_META_UP                           | 0.002874       | 0.167192        |
| CHOLESTEROL_BIOSYNTHESIS                                  | 0.010025       | 0.171841        |
| WNTPATHWAY                                                | 0.004938       | 0.172716        |
| SERUM_FIBROBLAST_CELLCYCLE                                | 0              | 0.173505        |
| CERAMIDEPATHWAY                                           | 0.007576       | 0.175074        |
| GREENBAUM_E2A_UP                                          | 0.00545        | 0.175203        |
| CITRATE_CYCLE_TCA_CYCLE                                   | 0.011737       | 0.176029        |
| MOREAUX_TACI_HI_VS_LOW_DN                                 | 0              | 0.183938        |
| HSA03050_PROTEASOME                                       | 0.013986       | 0.189776        |
| GOLDRATH_CYTOLYTIC                                        | 0.002494       | 0.191318        |
| FLECHNER_KIDNEY_TRANSPLANT_REJECTION_PBL_UP               | 0.00551        | 0.193149        |
| BREAST_DUCTAL_CARCINOMA_GENES                             | 0.017241       | 0.194818        |
| HSA00903_LIMONENE_AND_PINENE_DEGRADATION                  | 0.00978        | 0.194992        |
| ROTH_HTERT_DIFF                                           | 0.018277       | 0.19564         |
| ADIP_VS_PREADIP_UP                                        | 0.015228       | 0.196429        |
| UVB_SCC_UP                                                | 0.005618       | 0.196595        |
| ADIP_DIFF_CLUSTER4                                        | 0.012315       | 0.196838        |
| HSA00020_CITRATE_CYCLE                                    | 0.024096       | 0.198962        |
| UVB_NHEK3_C1                                              | 0.002793       | 0.199318        |
| GENOTOXINS_ALL_4HRS_REG                                   | 0.019774       | 0.199545        |
| CROONQUIST_IL6_STARVE_UP                                  | 0.01269        | 0.199577        |
| PENG_LEUCINE_DN                                           | 0              | 0.199674        |
| FALT_BCCL_IG_MUTATED_VS_WT_DN                             | 0.005222       | 0.200563        |
| HSA00970_AMINOACYL_TRNA_BIOSYNTHESIS                      | 0.002469       | 0.200783        |
| ESR_FIBROBLAST_DN                                         | 0.0175         | 0.20209         |
| LI_FETAL_VS_WT_KIDNEY_DN                                  | 0              | 0.2038          |
| G1_TO_S_CELL_CYCLE_REACTOME                               | 0.002817       | 0.204606        |
| ERM_KO_TESTES_DN                                          | 0.012755       | 0.205221        |
| AMINOACYL_TRNA_BIOSYNTHESIS                               | 0.014815       | 0.205276        |
| FLECHNER_KIDNEY_TRANSPLANT_WELL_UP                        | 0              | 0.20582         |
| UVC_HIGH_D3_DN                                            | 0.011594       | 0.205994        |
| PROTEASOME                                                | 0.0199         | 0.207017        |
| ZHAN_MMPC_PC                                              | 0.0199         | 0.207796        |

|                                           |          |          |
|-------------------------------------------|----------|----------|
| HSA00650_BUTANOATE_METABOLISM             | 0.005141 | 0.208177 |
| NICK_RHAPC_UP                             | 0.023866 | 0.208613 |
| VIPPATHWAY                                | 0.012346 | 0.209303 |
| HSA04110_CELL_CYCLE                       | 0        | 0.209445 |
| HSA00100_BIOSYNTHESIS_OF_STEROIDS         | 0.021687 | 0.209828 |
| DNA_REPLICATION_REACTOME                  | 0.002725 | 0.21018  |
| SANA_IFNG_ENDOTHELIAL_UP                  | 0.002703 | 0.210289 |
| SIG_BCR_SIGNALING_PATHWAY                 | 0        | 0.210458 |
| LEE_TCELLS8_UP                            | 0        | 0.210468 |
| MMS_HUMAN_LYMPH_LOW_4HRS_DN               | 0.019048 | 0.210616 |
| YU_CMYC_DN                                | 0.005764 | 0.211616 |
| LINDSTEDT_DEND_8H_VS_48H_DN               | 0        | 0.211946 |
| BRENTANI_DNA_METHYLATION_AND_MODIFICATION | 0.017812 | 0.212533 |
| DOX_RESIST_GASTRIC_DN                     | 0.033735 | 0.213254 |
| LINDSTEDT_DEND_DN                         | 0.013966 | 0.213501 |
| AGUIRRE_PANCREAS_CHR1                     | 0.024876 | 0.21493  |
| MANALO_HYPOXIA_DN                         | 0.008982 | 0.216811 |
| LEE_TCELLS10_UP                           | 0.003546 | 0.223663 |
| CMV_HCMV_TIMECOURSE_18HRS_UP              | 0.009317 | 0.223924 |
| FLOTHO_CASP8AP2_MRD_DIFF                  | 0.008403 | 0.224453 |
| HSC_STHSC_ADULT                           | 0.027919 | 0.226237 |
| IFNA_HCMV_6HRS_UP                         | 0.014749 | 0.235057 |
| VERNELL_PRB_CLSTR1                        | 0.019126 | 0.246323 |
| GALE_FLT3ANDAPL_UP                        | 0.028497 | 0.24699  |
| LEE_TCELLS1_UP                            | 0.0033   | 0.247035 |
| HDACI_COLON_SUL30MIN_DN                   | 0.023981 | 0.247665 |
| UV-4NQO_FIBRO_UP                          | 0.032258 | 0.249644 |
| CITED1_KO_HET_DN                          | 0.022005 | 0.249921 |

## Experiment 2

---

| <u>Gene Set</u>                    | <u>p-value</u> | <u>FDR</u> |
|------------------------------------|----------------|------------|
| MOOTHA_VOXPPOS                     | 0              | 6.59E-04   |
| ELECTRON_TRANSPORT_CHAIN           | 0              | 9.89E-04   |
| HSA00190_OXIDATIVE_PHOSPHORYLATION | 0              | 0.001978   |
| CMV_HCMV_TIMECOURSE_18HRS_UP       | 0              | 0.002645   |
| ZHAN_MULTIPLE_MYELOMA_VS_NORMAL_DN | 0              | 0.002696   |
| FLECHNER_KIDNEY_TRANSPLANT_WELL_UP | 0              | 0.002865   |
| ROSS_CBF_MYH                       | 0              | 0.002895   |
| UVC_TTD-XPCS_COMMON_DN             | 0              | 0.00302    |
| ZHAN_MMPC_PC                       | 0              | 0.003061   |
| UVB_NHEK1_C6                       | 0              | 0.003126   |
| OXIDATIVE_PHOSPHORYLATION          | 0              | 0.003126   |
| CISPLATIN_PROBCELL_UP              | 0              | 0.003401   |
| UVB_NHEK1_DN                       | 0              | 0.003524   |
| UVC_TTD_4HR_DN                     | 0              | 0.003552   |
| DOX_RESIST_GASTRIC_DN              | 0              | 0.003828   |
| CMV_HCMV_TIMECOURSE_16HRS_UP       | 0              | 0.004633   |
| UVC_TTD_ALL_DN                     | 0              | 0.005194   |
| DAVIES_MGUS_MM                     | 0              | 0.005277   |
| UVC_XPCS_ALL_DN                    | 0              | 0.005621   |

|                                            |          |          |
|--------------------------------------------|----------|----------|
| UVC_XPCS_4HR_DN                            | 0        | 0.005815 |
| TAKEDA_NUP8_HOXA9_3D_DN                    | 0        | 0.007521 |
| ADDYA_K562_HEMIN_TREATMENT                 | 0        | 0.007531 |
| 4NQO_UNIQUE_FIBRO_UP                       | 0        | 0.007784 |
| HOGERKORP_ANTI_CD44_UP                     | 0.002257 | 0.010422 |
| UVB_NHEK1_C1                               | 0        | 0.010545 |
| BYSTROM_IL5_DN                             | 0        | 0.011542 |
| GSK3PATHWAY                                | 0.00237  | 0.012568 |
| UVB_SCC_DN                                 | 0        | 0.012622 |
| HSC_MATURE_SHARED                          | 0        | 0.012891 |
| IGLESIAS_E2FMINUS_UP                       | 0        | 0.013016 |
| LAL_KO_3MO_UP                              | 0        | 0.013053 |
| TAVOR_CEBP_UP                              | 0        | 0.013292 |
| UVC_HIGH_D6_DN                             | 0        | 0.01337  |
| UVC_XPCS_8HR_DN                            | 0        | 0.013611 |
| EGF_HDMEC_UP                               | 0        | 0.01623  |
| HSC_MATURE_ADULT                           | 0        | 0.017293 |
| BLEO_HUMAN_LYMPH_HIGH_24HRS_UP             | 0        | 0.017492 |
| PAR1PATHWAY                                | 0.002315 | 0.017931 |
| APPEL_IMATINIB_UP                          | 0.009132 | 0.020307 |
| SIG_BCR_SIGNALING_PATHWAY                  | 0        | 0.021221 |
| GUO_HEX_UP                                 | 0        | 0.024324 |
| HSA04662_B_CELL_RECEPTOR_SIGNALING_PATHWAY | 0        | 0.026232 |
| CANCERDRUGS_PROBCELL_UP                    | 0        | 0.027111 |
| KNUDSEN_PMNS_UP                            | 0        | 0.027464 |
| PARK_RARALPHA_UP                           | 0.002336 | 0.028013 |
| CHEN_HOXA5_TARGETS_UP                      | 0        | 0.028313 |
| BADPATHWAY                                 | 0        | 0.028361 |
| PPARAPATHWAY                               | 0        | 0.028481 |
| ET743_RESIST_DN                            | 0.004494 | 0.028786 |
| IL7PATHWAY                                 | 0.002257 | 0.029149 |
| HSA00512_O_GLYCAN_BIOSYNTHESIS             | 0.002342 | 0.029461 |
| FSH_OVARY_MCV152_UP                        | 0.00237  | 0.029656 |
| VERHAAK_AML_NPM1_MUT_VS_WT_UP              | 0        | 0.029698 |
| DIAB_NEPH_DN                               | 0        | 0.030661 |
| IDX_TSA_DN_CLUSTER2                        | 0        | 0.030902 |
| REOVIRUS_HEK293_UP                         | 0        | 0.031125 |
| MRNA_PROCESSING_REACTOME                   | 0        | 0.031163 |
| CPR_LOW_LIVER_DN                           | 0.002237 | 0.034307 |
| ET743_SARCOMA_48HRS_DN                     | 0        | 0.034591 |
| UEDA_MOUSE_LIVER                           | 0        | 0.035932 |
| HSA05213_ENDOMETRIAL_CANCER                | 0        | 0.035968 |
| LAL_KO_6MO_UP                              | 0.0025   | 0.03643  |
| HSA04210_APOPTOSIS                         | 0        | 0.036538 |
| BASSO_GERMINAL_CENTER_CD40_UP              | 0        | 0.036953 |
| UVB_NHEK2_UP                               | 0        | 0.038306 |
| JECHLINGER_EMT_DN                          | 0.004728 | 0.040885 |
| UVB_SCC_UP                                 | 0        | 0.042936 |
| SPPAPATHWAY                                | 0.004484 | 0.043119 |
| EMT_DN                                     | 0.004878 | 0.043142 |
| METHOTREXATE_PROBCELL_UP                   | 0.004494 | 0.043272 |

|                                            |          |          |
|--------------------------------------------|----------|----------|
| MTORPATHWAY                                | 0.002188 | 0.043386 |
| BRCA1_SW480_UP                             | 0.002304 | 0.04387  |
| TNFALPHA_4HRS_UP                           | 0        | 0.044159 |
| CHANG_SERUM_RESPONSE_DN                    | 0        | 0.045199 |
| HDACI_COLON_BUT24HRS_DN                    | 0        | 0.048671 |
| LI_FETAL_VS_WT_KIDNEY_UP                   | 0        | 0.048813 |
| AGED_MOUSE_RETINA_ANY_UP                   | 0.013216 | 0.049317 |
| CHEMICALPATHWAY                            | 0.004831 | 0.049359 |
| HSC_MATURE_FETAL                           | 0        | 0.049442 |
| VHL_NORMAL_UP                              | 0        | 0.049535 |
| CHIARETTI_T_ALL                            | 0        | 0.050025 |
| CAMPTOTHECIN_PROBCELL_UP                   | 0.015419 | 0.050606 |
| ET743_SARCOMA_72HRS_UP                     | 0        | 0.050676 |
| ADIP_DIFF_CLUSTER5                         | 0.002299 | 0.050759 |
| AGED_MOUSE_HIPPOCAMPUS_MULTI_UP            | 0.009195 | 0.051151 |
| BRCA2_BRCA1_DN                             | 0        | 0.051261 |
| BRCA1KO_MEF_DN                             | 0        | 0.051297 |
| MRNA_PROCESSING                            | 0.002358 | 0.051458 |
| ST_INTERLEUKIN_4_PATHWAY                   | 0.008811 | 0.052007 |
| AGED_MOUSE_HYPOTH_UP                       | 0.005    | 0.05226  |
| H2O2_CSBRESCUED_UP                         | 0        | 0.052819 |
| AGED_MOUSE_HIPPOCAMPUS_ANY_UP              | 0.009434 | 0.056358 |
| ET743_SARCOMA_24HRS_DN                     | 0        | 0.056424 |
| SERUM_FIBROBLAST_CORE_DN                   | 0        | 0.056996 |
| HSA05215_PROSTATE_CANCER                   | 0.002494 | 0.057314 |
| CHIARETTI_T_ALL_DIFF                       | 0        | 0.057463 |
| HSA03010_RIBOSOME                          | 0.005305 | 0.057704 |
| TAKEDA_NUP8_HOXA9_8D_DN                    | 0        | 0.057834 |
| FETAL_LIVER_ENRICHED_TRANSCRIPTION_FACTORS | 0        | 0.057887 |
| NEMETH_TNF_UP                              | 0        | 0.057896 |
| HSA05214_GLIOMA                            | 0.002475 | 0.058086 |
| BRG1_ALAB_DN                               | 0.007194 | 0.058177 |
| FLECHNER_KIDNEY_TRANSPLANT_REJECTION_DN    | 0        | 0.058405 |
| ZHAN_MMPC_LATEVS                           | 0.004831 | 0.058869 |
| IRITANI_ADPROX_DN                          | 0.004808 | 0.059448 |
| TCELL_ANERGIC_UP                           | 0.002488 | 0.059753 |
| TNFALPHA_ALL_UP                            | 0        | 0.059979 |
| SIG_PIP3_SIGNALING_IN_B_LYMPHOCYTES        | 0.007194 | 0.062012 |
| GREENBAUM_E2A_UP                           | 0.011574 | 0.066502 |
| UVC_HIGH_D3_DN                             | 0.009456 | 0.068106 |
| UBIQUINONE_BIOSYNTHESIS                    | 0.010823 | 0.068673 |
| KLEIN_PEL_DN                               | 0.002433 | 0.070341 |
| HOGERKORP_CD44_UP                          | 0.02     | 0.070526 |
| ST_B_CELL_ANTIGEN_RECEPTOR                 | 0.004706 | 0.071547 |
| P53PATHWAY                                 | 0.022222 | 0.071608 |
| PENG_Glutamine_DN                          | 0        | 0.072536 |
| HSC_LATEPROGENITORS_SHARED                 | 0        | 0.072656 |
| ET743_SARCOMA_DN                           | 0        | 0.073454 |
| HSA04640_HEMATOPOIETIC_CELL_LINEAGE        | 0.002618 | 0.073473 |
| HDACI_COLON_CLUSTER6                       | 0        | 0.073671 |
| PITX2PATHWAY                               | 0.013129 | 0.073753 |

|                                                 |          |                 |
|-------------------------------------------------|----------|-----------------|
| HSA01510_NEURODEGENERATIVE_DISEASES             | 0.007059 | 0.073783        |
| GAMMA-UV_FIBRO_UP                               | 0        | 0.074311        |
| MYOD_NIH3T3_DN                                  | 0.002347 | 0.074553        |
| TRANSLATION_FACTORS                             | 0        | 0.074667        |
| HCC_SURVIVAL_GOOD_VS_POOR_DN                    | 0        | 0.078256        |
| <b>STEMCELL_COMMON_UP</b>                       | <b>0</b> | <b>0.078565</b> |
| PENG_GLUKOSE_DN                                 | 0        | 0.078787        |
| SA_PTEN_PATHWAY                                 | 0.029885 | 0.078966        |
| FSH_OVARY_MCV152_DN                             | 0.009592 | 0.079017        |
| BRCA1_OVEREXP_UP                                | 0        | 0.079045        |
| HUMAN_CD34_ENRICHED_TRANSCRIPTION_FACTORS       | 0        | 0.079152        |
| HSC_LATEPROGENITORS_ADULT                       | 0        | 0.079309        |
| KIM_TH_CELLS_DN                                 | 0.014925 | 0.079438        |
| PTENPATHWAY                                     | 0.021505 | 0.079475        |
| HSA00760_NICOTINATE_AND_NICOTINAMIDE_METABOLISM | 0.025862 | 0.079914        |
| LINDSTEDT_DEND_DN                               | 0.009434 | 0.079972        |
| LEE_DENA_UP                                     | 0.011655 | 0.080075        |
| WELCH_GATA1                                     | 0.029613 | 0.081613        |
| MITOCHONDRIAL_FATTY_ACID_BETAOXIDATION          | 0.021645 | 0.081637        |
| HSC_LATEPROGENITORS_FETAL                       | 0        | 0.081927        |
| ST_P38_MAPK_PATHWAY                             | 0.009547 | 0.081984        |
| JISON_SICKLECELL_DIFF                           | 0        | 0.082102        |
| RIBAVIRIN_RSV_DN                                | 0.009501 | 0.082145        |
| HSA05220_CHRONIC_MYELOID_LEUKEMIA               | 0        | 0.082368        |
| UVC_HIGH_ALL_DN                                 | 0        | 0.082401        |
| TAKEDA_NUP8_HOXA9_16D_DN                        | 0        | 0.08266         |
| CMV_HCMV_TIMECOURSE_ALL_UP                      | 0        | 0.082711        |
| UVC_TTD_8HR_DN                                  | 0        | 0.083492        |
| RCC_NL_UP                                       | 0        | 0.08597         |
| YAGI_AML_PROG_FAB                               | 0        | 0.08646         |
| IGF1MTORPATHWAY                                 | 0.017978 | 0.086608        |
| BYSTROM_IL5_UP                                  | 0.009412 | 0.08823         |
| HSA04670_LEUKOCYTE_TRANSENDOTHELIAL_MIGRATION   | 0.005115 | 0.088937        |
| YU_CMYC_DN                                      | 0.009709 | 0.089024        |
| KANNAN_P53_UP                                   | 0.006772 | 0.089119        |
| AGEING_BRAIN_UP                                 | 0        | 0.089316        |
| HEMATOPOESIS_RELATED_TRANSCRIPTION_FACTORS      | 0        | 0.089734        |
| CROMER_HYPOPHARYNGEAL_MET_VS_NON_UP             | 0.005051 | 0.089774        |
| ET743_SARCOMA_72HRS_DN                          | 0        | 0.090142        |
| SCHURINGA_STAT5A_UP                             | 0.033708 | 0.090563        |
| LIAN_MYELOID_DIFF_RECEPTORS                     | 0.004673 | 0.090931        |
| ADIP_HUMAN_UP                                   | 0.014151 | 0.092269        |
| IDX_TSA_DN_CLUSTER4                             | 0.027335 | 0.095299        |
| PRMT5_KD_UP                                     | 0.002747 | 0.095397        |
| H2O2_CSBRESCUED_C1_UP                           | 0.022556 | 0.097066        |
| HADDAD_HPCLYMPHO_ENRICHED                       | 0        | 0.098018        |
| GCRPATHWAY                                      | 0.025463 | 0.100363        |
| KENNY_WNT_DN                                    | 0.009412 | 0.100783        |
| FERRANDO_MLL_T_ALL_DN                           | 0.015424 | 0.100995        |
| HSA05221_ACUTE_MYELOID_LEUKEMIA                 | 0.007481 | 0.101142        |
| ZHAN_MM_CD138_MF_VS_REST                        | 0.011338 | 0.101183        |

|                                                     |          |          |
|-----------------------------------------------------|----------|----------|
| FLECHNER_KIDNEY_TRANSPLANT_REJECTION_PBL_UP         | 0.00716  | 0.101457 |
| WELCSH_BRCA_UP                                      | 0.014286 | 0.101851 |
| UVB_NHEK3_C2                                        | 0.013921 | 0.102185 |
| LINDSTEDT_DEND_8H_VS_48H_DN                         | 0.012107 | 0.10298  |
| TNFA_NFKB_DEP_UP                                    | 0.03386  | 0.103225 |
| AGUIRRE_PANCREAS_CHR12                              | 0.012315 | 0.103322 |
| HSA05211_RENAL_CELL_CARCINOMA                       | 0.004938 | 0.10349  |
| HDACI_COLON_BUT_DN                                  | 0        | 0.103707 |
| AGED_RHESUS_DN                                      | 0.002667 | 0.104366 |
| CHREBPPATHWAY                                       | 0.033482 | 0.10514  |
| ALZHEIMERS_INCIPIENT_UP                             | 0        | 0.107168 |
| ALCALAY_AML_NPMC_DN                                 | 0.00271  | 0.107191 |
| HSA04664_FC_EPSILON_RI_SIGNALING_PATHWAY            | 0.017115 | 0.107241 |
| HSA04120_UBIQUITIN_MEDIATED_PROTEOLYSIS             | 0.028369 | 0.108609 |
| CELL_PROLIFERATION                                  | 0        | 0.108837 |
| HIVNEFPATHWAY                                       | 0.016393 | 0.109086 |
| CARIES_PULP_UP                                      | 0        | 0.109152 |
| RARRXRPATHWAY                                       | 0.029613 | 0.109309 |
| UVB_NHEK2_DN                                        | 0.004938 | 0.10949  |
| GOLDRATH_HP                                         | 0        | 0.109569 |
| VANASSE_BCL2_TARGETS                                | 0.005208 | 0.109659 |
| APOPTOSIS_KEGG                                      | 0.009456 | 0.109683 |
| NFKBPATHWAY                                         | 0.041667 | 0.110225 |
| ST_DICTYOSTELIUM_DISCOIDEUM_CAMP_CHEMOTAXIS_PATHWAY | 0.033784 | 0.110229 |
| HIPPOCAMPUS_DEVELOPMENT_NEONATAL                    | 0.026201 | 0.110384 |
| CPR_NULL_LIVER_UP                                   | 0.028037 | 0.110387 |
| SHEPARD_CELL_PROLIFERATION                          | 0        | 0.111479 |
| IDX_TSA_DN_CLUSTER5                                 | 0.0199   | 0.111949 |
| STRESS_ARSENIC_SPECIFIC_UP                          | 0.005263 | 0.115032 |
| CMV_8HRS_DN                                         | 0.02451  | 0.115152 |
| AGED_MOUSE_CORTEX_DN                                | 0.021277 | 0.1154   |
| MITOCHONDRIAPATHWAY                                 | 0.03304  | 0.115686 |
| WALKER_MM_SNP_DIFF                                  | 0.022573 | 0.115976 |
| HSA04612_ANTIGEN_PROCESSING_AND_PRESENTATION        | 0.028571 | 0.116235 |
| HADDAD_HSC_CD10_UP                                  | 0        | 0.119246 |
| RUTELLA_HEPATGFSNDCS_UP                             | 0.005362 | 0.12212  |
| BRACX_UP                                            | 0.030369 | 0.122697 |
| FALT_BCLL_IG_MUTATED_VS_WT_DN                       | 0.016746 | 0.125872 |
| ROSS_FAB_M7                                         | 0.01292  | 0.128582 |
| NOS1PATHWAY                                         | 0.036036 | 0.129882 |
| SHEPARD_BMYB_MORPHOLINO_UP                          | 0.005479 | 0.133235 |
| ST_PHOSPHOINOSITIDE_3_KINASE_PATHWAY                | 0.035794 | 0.133244 |
| FATTY_ACID_METABOLISM                               | 0.012225 | 0.133347 |
| NI2_MOUSE_UP                                        | 0.02439  | 0.133434 |
| CHESLER_BRAIN_HIGHEST_VARIANCE_GENES                | 0.031963 | 0.133754 |
| ADIPOGENESIS_HMSC_CLASS3_UP                         | 0.022059 | 0.134252 |
| TAKEDA_NUP8_HOXA9_10D_DN                            | 0.007444 | 0.13641  |
| HSA05110_CHOLERA_INFECTION                          | 0.032258 | 0.137075 |
| JISON_SICKLE_CELL                                   | 0.037221 | 0.137338 |
| TARTE_PLASMA_BLASTIC                                | 0        | 0.139041 |
| ROME_INSULIN_2F_UP                                  | 0.002817 | 0.13928  |



|                                                              |          |          |
|--------------------------------------------------------------|----------|----------|
| RADIATION_SENSITIVITY                                        | 0.040512 | 0.140217 |
| UVC_HIGH_D9_DN                                               | 0.045249 | 0.141962 |
| FATTY_ACID_DEGRADATION                                       | 0.038278 | 0.143049 |
| BREASTCA_TWO_CLASSES                                         | 0.002597 | 0.143391 |
| LEE_MYC_E2F1_DN                                              | 0.027708 | 0.145447 |
| BRCA_PROGNOSIS_NEG                                           | 0.015789 | 0.145997 |
| KNUDSEN_PMNS_DN                                              | 0        | 0.146171 |
| HDACI_COLON_BUT16HRS_DN                                      | 0.013263 | 0.146543 |
| ALCALAY_AML_NPMC_UP                                          | 0.007653 | 0.14679  |
| FLECHNER_KIDNEY_TRANSPLANT_WELL_PBL_UP                       | 0.002558 | 0.149866 |
| IDX_TSA_DN_CLUSTER3                                          | 0.012107 | 0.150472 |
| ADIP_DIFF_CLUSTER1                                           | 0.041463 | 0.152031 |
| HSA05120_EPITHELIAL_CELL_SIGNALING_IN_HELICOBACTER_PYLORI_IN | 0.015982 | 0.152096 |
| GLUTAMATE_METABOLISM                                         | 0.048055 | 0.152817 |
| MOREAUX_TACI_HI_VS_LOW_DN                                    | 0.002924 | 0.152821 |
| IRITANI_ADPROX_VASC                                          | 0.011396 | 0.153105 |
| UVC_HIGH_D2_DN                                               | 0.031532 | 0.15323  |
| DEATHPATHWAY                                                 | 0.046512 | 0.153525 |
| PARK_MSCS_LIN2                                               | 0.03632  | 0.153784 |
| CIS_XPC_DN                                                   | 0.005917 | 0.153826 |
| AGEING_KIDNEY_UP                                             | 0        | 0.154118 |
| NGUYEN KERATO_DN                                             | 0.019277 | 0.154268 |
| HSA04650_NATURAL_KILLER_CELL_MEDIATED_CYTOTOXICITY           | 0.007895 | 0.154389 |
| ZHAN_MM_CD138_LB_VS_REST                                     | 0.04814  | 0.154666 |
| MRNA_SPLICING                                                | 0.032483 | 0.154759 |
| UEDA_MOUSE_SCN                                               | 0.028497 | 0.155327 |
| HOHENKIRK_MONOCYTE_DEND_DN                                   | 0.00838  | 0.157715 |
| UV-CMV_UNIQUE_HCMV_6HRS_DN                                   | 0.025707 | 0.159342 |
| BASSO_REGULATORY_HUBS                                        | 0.010959 | 0.159804 |
| HSA04115_P53_SIGNALING_PATHWAY                               | 0.034063 | 0.160129 |
| HPV31_UP                                                     | 0.025761 | 0.160199 |
| LIAN_MYELOID_DIFF_TF                                         | 0.044346 | 0.160375 |
| UVB_NHEK1_UP                                                 | 0.007732 | 0.160828 |
| GH_AUTOCRINE_UP                                              | 0.005556 | 0.160842 |
| FERNANDEZ_MYC_TARGETS                                        | 0.010076 | 0.164639 |
| ZHAN_MULTIPLE_MYELOMA_VS_NORMAL_UP                           | 0.032099 | 0.165412 |
| LIAN_MYELOID_DIFF_GRANULE                                    | 0.046771 | 0.167368 |
| AGED_MOUSE_NEOCORTEX_UP                                      | 0.038071 | 0.168319 |
| SANA_TNFA_ENDOTHELIAL_UP                                     | 0.026316 | 0.170334 |
| LEE_CIP_UP                                                   | 0.041262 | 0.170761 |
| EMT_UP                                                       | 0.034063 | 0.17081  |
| YU_CMYC_UP                                                   | 0.047859 | 0.171336 |
| PENG_LEUCINE_UP                                              | 0.015228 | 0.171888 |
| UVC_HIGH_D5_DN                                               | 0.043796 | 0.172527 |
| MMS_MOUSE_LYMPH_HIGH_24HRS_UP                                | 0.047733 | 0.173025 |
| CARIES_PULP_HIGH_UP                                          | 0.022556 | 0.174459 |
| GERY_CEBP_TARGETS                                            | 0.011396 | 0.175499 |
| HOHENKIRK_MONOCYTE_DEND_UP                                   | 0.00978  | 0.175627 |
| HDACI_COLON_BUT48HRS_DN                                      | 0.013514 | 0.175847 |
| ET743_SARCOMA_UP                                             | 0.033097 | 0.176347 |
| BROCKE_IL6                                                   | 0.01084  | 0.178308 |

|                                     |          |          |
|-------------------------------------|----------|----------|
| GOLDRATH_CELLCYCLE                  | 0.035047 | 0.179657 |
| LEI_MYB_REGULATED_GENES             | 0.00639  | 0.185362 |
| SCHUMACHER_MYC_UP                   | 0.039535 | 0.185555 |
| AGEING_BRAIN_DN                     | 0.015789 | 0.185865 |
| FRASOR_ER_DN                        | 0.035635 | 0.187226 |
| KRETZSCHMAR_IL6_DIFF                | 0.01087  | 0.187797 |
| TGFBETA_EARLY_UP                    | 0.045024 | 0.187851 |
| BRCA1_OVEREXP_PROSTATE_UP           | 0.005848 | 0.188262 |
| ASTON_DEPRESSION_DN                 | 0.020958 | 0.188442 |
| UVB_NHEK3_ALL                       | 0        | 0.191848 |
| IRITANI_ADPROX_LYMPH                | 0.026895 | 0.195347 |
| AGEING_KIDNEY_SPECIFIC_DN           | 0.022785 | 0.19537  |
| KANG_TERT_UP                        | 0.039164 | 0.196245 |
| MANALO_HYPOXIA_UP                   | 0.027027 | 0.19645  |
| RIBOSOMAL_PROTEINS                  | 0.035806 | 0.196571 |
| HSA04630_JAK_STAT_SIGNALING_PATHWAY | 0.036458 | 0.196584 |
| APOPTOSIS                           | 0.036364 | 0.196624 |
| CHESLER_HIGHEST_FOLD_RANGE_GENES    | 0.042453 | 0.196738 |
| HSA05218_MELANOMA                   | 0.037879 | 0.196759 |
| UVB_NHEK3_C0                        | 0.029024 | 0.198288 |
| NADLER_OBESITY_UP                   | 0.043678 | 0.201085 |
| HADDAD_HSC_CD7_DN                   | 0.046341 | 0.20115  |
| CMV_HCMV_TIMECOURSE_48HRS_UP        | 0.031785 | 0.204007 |
| HSA05210_COLORECTAL_CANCER          | 0.035545 | 0.204524 |
| UVB_NHEK3_C1                        | 0.038369 | 0.204993 |
| P53_SIGNALING                       | 0.044665 | 0.206417 |
| HSA05222_SMALL_CELL_LUNG_CANCER     | 0.038462 | 0.206959 |
| IDX_TSA_UP_CLUSTER6                 | 0.017192 | 0.207139 |
| PENG_LEUCINE_DN                     | 0.016807 | 0.207153 |
| ICHIBA_GVHD                         | 0.009434 | 0.207288 |
| CIS_XPC_UP                          | 0.024213 | 0.207322 |
| NING_COPD_DN                        | 0.032432 | 0.20861  |
| TPA_SENS_EARLY_DN                   | 0.003195 | 0.208968 |
| BAF57_BT549_UP                      | 0.009202 | 0.213634 |
| BAF57_BT549_DN                      | 0.012422 | 0.216771 |
| OKUMURA_MC_LPS                      | 0.018127 | 0.220614 |
| BRENTANI_DEATH                      | 0.04703  | 0.226819 |
| BYSTRYKH_HSC_BRAIN_TRANS_GLOCUS     | 0.034682 | 0.233787 |
| HYPOXIA_NORMAL_UP                   | 0.0271   | 0.239849 |
| HUMAN_MITODB_6_2002                 | 0.007067 | 0.245815 |
